# Supplementary figures and images for: Prognostic evaluation of COPD patients: GOLD 2011 versus BODE and the COPD comorbidity index COTE
Source: HighWire-hosted journal article supplement (doi:10.1136/thoraxjnl-2014-205770), 2014-06-26

Supplementary figures

Histogram showing each BODE and COTE score percentage distribution.

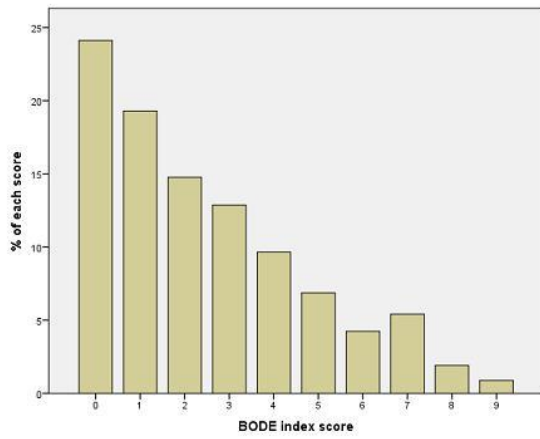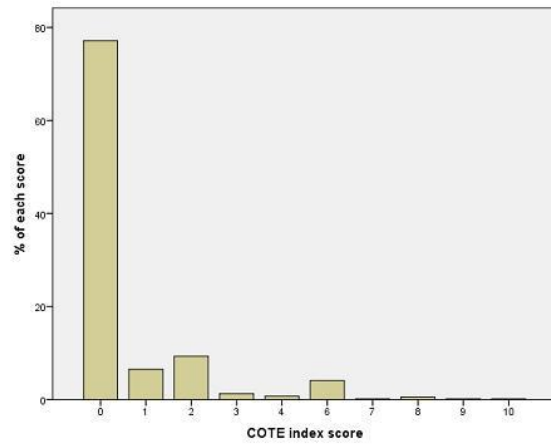

Supplement: thoraxjnl-2014-205770supp.pdf [file thoraxjnl-2014-205770supp.pdf]
